# Supplementary material for: Structure of the Pseudokinase VRK3 Reveals a Degraded Catalytic Site, a Highly Conserved Kinase Fold, and a Putative Regulatory Binding Site
Source: PubMed Central journal article supplement (PMC2639636; doi:10.1016/j.str.2008.10.018), 2009-01-14

## Supplemental Data

## Structure of the Pseudokinase VRK3 Reveals a Degraded Catalytic Site, a Highly Conserved Kinase Fold, and a Putative Regulatory Binding Site

Eric D. Scheeff, Jeyanthi Eswaran, Gabor Bunkoczi, Stefan Knapp, and Gerard Manning

**Table S1. Crystallographic Data and Refinement Statistics**

| Data Collection                                     | VRK2                             | VRK3                              |
|-----------------------------------------------------|----------------------------------|-----------------------------------|
| Space group                                         | P2 <sub>1</sub> 2 <sub>1</sub> 2 | P2 <sub>1</sub>                   |
| Cell dimensions [Å and °]                           | a=70.65, b=157.53, c=56.29       | a=91.26, b=54.42, c=91.82, β=91.2 |
| Resolution*                                         | 1.7 (1.7-1.8)                    | 2.0 (2.0-2.1)                     |
| Unique observations*                                | 67759 (10022)                    | 60969 (8014)                      |
| Completeness* [%]                                   | 96.9 (93.3)                      | 99.2 (95.4)                       |
| Redundancy*                                         | 5.8 (5.5)                        | 3.6 (2.6)                         |
| <i>R</i> <sub>merge</sub> *                         | 0.0562 (0.5859)                  | 0.0648 (0.4167)                   |
| <i>I</i> / $\sigma I$ *                             | 15.3 (2.3)                       | 12.5 (2.2)                        |
| <b>Refinement</b>                                   |                                  |                                   |
| Reflections ( <i>R</i> <sub>free</sub> set)         | 64302 (3413)                     | 57853 (3092)                      |
| <i>R</i> <sub>work</sub> / <i>R</i> <sub>free</sub> | 0.201 / 0.236                    | 0.178 / 0.223                     |
| Atoms (P/L/W) <sup>#</sup>                          | 4828 / 21 / 334                  | 5143 / 20 / 514                   |
| B-factors (P/L/W) <sup>#</sup> [Å <sup>2</sup> ]    | 34.1 / 50.0 / 38.5               | 34.9 / 49.0 / 40.8                |
| RMSD bonds [Å]                                      | 0.015                            | 0.011                             |
| RMSD [°]                                            | 1.483                            | 1.265                             |
| <b>Ramachandran</b>                                 |                                  |                                   |
| favorable [%]                                       | 99.6                             | 100.0                             |
| allowed [%]                                         | 0.4                              | 0.0                               |

**Table S2. Superpositions between VRK2 and VRK3 and Other Representative Protein Kinases, as Aligned by DaliLite (Holm and Park, 2000)**

| Structure (PDB ID: Chain) | VRK3 (2JII:B)        | VRK2 (2V62:A)        | CK1 (1CSN:A)         | PKA (1CDK:A)       |
|---------------------------|----------------------|----------------------|----------------------|--------------------|
| <b>VRK2</b> (2V62:A)      | 2.3<br>(291,38,35.4) |                      |                      |                    |
| <b>CK1</b> (1CSN:A)       | 2.1<br>(271,23,30.3) | 2.4<br>(266,27,29.2) |                      |                    |
| <b>PKA</b> (1CDK:A)       | 3.1<br>(257,16,22.2) | 3.1<br>(241,18,20)   | 2.8<br>(258,19,23.9) |                    |
| <b>Sky1p</b> (1Q97:A)     | 3.0<br>(272,15,23.6) | 3.1<br>(262,19,21)   | 2.6<br>(250,20,22.9) | 2.7<br>(251,26,24) |

RMSD is given in Å, followed by additional information on the structural comparison in parentheses: number of aligned positions, % sequence identity, and DaliLite Z-score. Comparisons between VRK3 and VRK2 and paralogues are highlighted in gray.

**Table S3. Inhibitor Screening Results for VRK1**

| Compound name                                                  | Chemical structure                                                                                                                                                                                                                                                                                                                                   | VRK1<br>T <sub>m</sub> Shift [°C] |
|----------------------------------------------------------------|------------------------------------------------------------------------------------------------------------------------------------------------------------------------------------------------------------------------------------------------------------------------------------------------------------------------------------------------------|-----------------------------------|
| 3-(2-Chloro-3-indolylmethylene)-1,3-dihydroindol-2-one         | 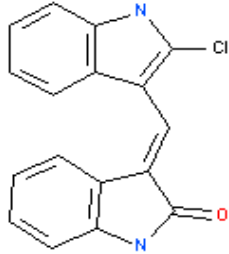 <p>The structure shows two indole rings. The top indole ring has a chlorine atom at the 2-position and is connected via its 3-position to the 3-position of a second indole ring. This second indole ring has a carbonyl group at the 2-position.</p>             | 4                                 |
| ASC67                                                          |  <p>The structure features a central pyrimidine ring connected via its 2 and 6 positions to two imidazole rings. One imidazole ring is substituted with a cyclopentane ring, and the other is substituted with a 4-cyanophenyl group.</p>                          | 4.3                               |
| ASC24                                                          |  <p>The structure is similar to ASC67, with a central pyrimidine ring connected to two imidazole rings. One imidazole ring is substituted with a cyclopropane ring, and the other is substituted with a 4-cyanophenyl group.</p>                                  | 4.5                               |
| Oxindole I; 3-(1H-Pyrrol-2-ylmethylene)-1,3-dihydroindol-2-one |  <p>The structure shows an indole ring with a carbonyl group at the 2-position, which is connected via its 3-position to the 2-position of a pyrrole ring.</p>                                                                                                   | 3.5                               |
| 5-Iodo-3-[(3,5-dibromo-4-hydroxyphenyl)methylene]-2-indolinone |  <p>The structure shows an indole ring with a carbonyl group at the 2-position, which is connected via its 3-position to the 4-position of a phenyl ring. The phenyl ring has bromine atoms at the 3 and 5 positions and a hydroxyl group at the 4 position.</p> | 3.5                               |

**Table S4. Inhibitor Screening Results for VRK2**

| Compound name                                                    | Chemical structure                                                                   | VRK2<br>T <sub>m</sub> Shift [°C] |
|------------------------------------------------------------------|--------------------------------------------------------------------------------------|-----------------------------------|
| ASC67                                                            | 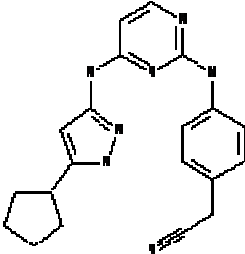   | 4.5                               |
| 3-(2-Chloro-3-indolylmethylene)-<br>1,3-dihydroindol-2-one       |     | 4                                 |
| ASC24                                                            |   | 4                                 |
| "Oxindole I; 3-(1H-Pyrrol-2-ylmethylene)-1,3-dihydroindol-2-one" |  | 3.5                               |
| ASC29                                                            |  | 3.5                               |

**Figure S1. Curated Alignment of VRKs and CK1s**  
Key sections discussed in text are highlighted.

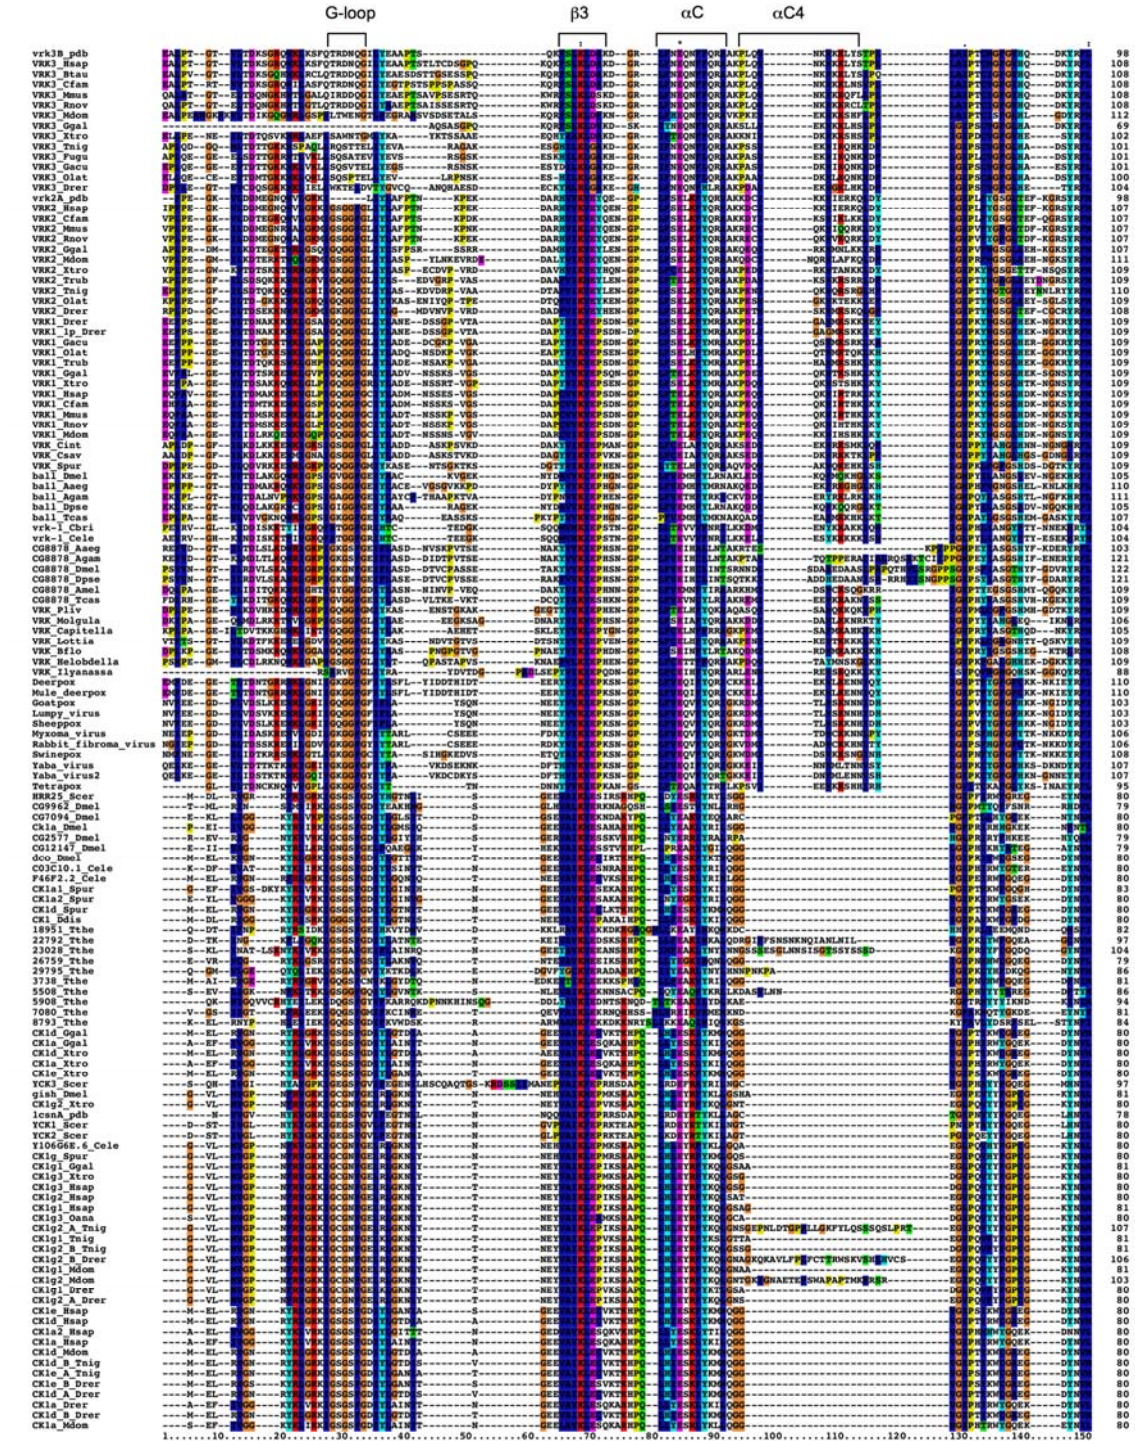



|                      |     |
|----------------------|-----|
| vrk3B_pdb            | 157 |
| VRK3_Hsap            | 167 |
| VRK3_Btau            | 167 |
| VRK3_Cfam            | 167 |
| VRK3_Mmus            | 167 |
| VRK3_Rnov            | 167 |
| VRK3_Hdom            | 171 |
| VRK3_Ggal            | 126 |
| VRK3_Xtro            | 161 |
| VRK3_Tnig            | 159 |
| VRK3_Pugu            | 159 |
| VRK3_Gacu            | 159 |
| VRK3_Olat            | 158 |
| VRK1_Drer            | 162 |
| vrk2A_pdb            | 155 |
| VRK2_Hsap            | 164 |
| VRK2_Cfam            | 164 |
| VRK2_Mmus            | 164 |
| VRK2_Rnov            | 164 |
| VRK2_Ggal            | 164 |
| VRK2_Hdom            | 168 |
| VRK2_Xtro            | 166 |
| VRK2_Trub            | 167 |
| VRK2_Tnig            | 168 |
| VRK2_Olat            | 167 |
| VRK2_Drer            | 166 |
| VRK1_Drer            | 167 |
| VRK1_Ip_Drer         | 167 |
| VRK1_Gacu            | 167 |
| VRK1_Olat            | 167 |
| VRK1_Trub            | 167 |
| VRK1_Ggal            | 167 |
| VRK1_Xtro            | 167 |
| VRK1_Hsap            | 167 |
| VRK1_Cfam            | 167 |
| VRK1_Mmus            | 167 |
| VRK1_Rnov            | 167 |
| VRK1_Hdom            | 167 |
| VRK_Cint             | 167 |
| VRK_Csav             | 167 |
| VRK_Spur             | 167 |
| ball_Dmel            | 163 |
| ball_Aaeg            | 168 |
| ball_Agam            | 169 |
| ball_Dpse            | 163 |
| ball_Tcas            | 164 |
| vrk-1_Cbri           | 162 |
| vrk-1_Cele           | 162 |
| CG878_Aaeg           | 326 |
| CG878_Agam           | 344 |
| CG878_Dmel           | 360 |
| CG878_Dpse           | 415 |
| CG878_Amel           | 167 |
| CG878_Tcas           | 166 |
| VRK_Pliv             | 167 |
| VRK_Molpula          | 165 |
| VRK_Capitella        | 163 |
| VRK_Lottia           | 167 |
| VRK_Bilo             | 126 |
| VRK_Melobdella       | 167 |
| VRK_Ilyanassa        | 146 |
| Deerpox              | 168 |
| Mula_deerpox         | 168 |
| Goatpox              | 161 |
| Lumpy_virus          | 161 |
| Ebspox               | 161 |
| Myxoma_virus         | 164 |
| Rabbit_fibroma_virus | 164 |
| Swinepox             | 166 |
| Yaba_virus           | 165 |
| Yaba_virus2          | 165 |
| Tatrapox             | 165 |
| RRR25_Scer           | 138 |
| CG9962_Dmel          | 137 |
| CG7094_Dmel          | 138 |
| Ck1a_Dmel            | 138 |
| CG2577_Dmel          | 137 |
| CG12147_Dmel         | 137 |
| cco_Dmel             | 138 |
| CG10101_Cele         | 138 |
| F46F2.2_Cele         | 138 |
| CK1a1_Spur           | 141 |
| CK1a2_Spur           | 138 |
| CK1d_Spur            | 138 |
| CK1_Ddis             | 138 |
| 18951_Ttbe           | 139 |
| 22792_Ttbe           | 155 |
| 23028_Ttbe           | 162 |
| 26759_Ttbe           | 137 |
| 29795_Ttbe           | 144 |
| 3738_Ttbe            | 139 |
| 5508_Ttbe            | 144 |
| 5908_Ttbe            | 152 |
| 7080_Ttbe            | 139 |
| 8753_Ttbe            | 142 |
| CK1d_Ggal            | 138 |
| CK1a_Ggal            | 138 |
| CK1d_Xtro            | 138 |
| CK1a_Xtro            | 148 |
| CK1a_Xtro            | 148 |
| YCK3_Scer            | 155 |
| gish_Dmel            | 139 |
| CK1g_Xtro            | 138 |
| IcanA_pdb            | 136 |
| YCK1_Scer            | 138 |
| YCK2_Scer            | 138 |
| Y106668.6_Cele       | 138 |
| CK1g_Spur            | 138 |
| CK1g1_Ggal           | 139 |
| CK1g1_Xtro           | 138 |
| CK1g1_Hsap           | 138 |
| CK1g2_Hsap           | 138 |
| CK1g1_Hsap           | 139 |
| CK1g3_Oma            | 138 |
| CK1g2_A_Tnig         | 165 |
| CK1g1_Tnig           | 139 |
| CK1g2_B_Tnig         | 139 |
| CK1g2_B_Drer         | 144 |
| CK1g1_Hdom           | 139 |
| CK1g2_Hdom           | 161 |
| CK1g1_Drer           | 138 |
| CK1g2_A_Drer         | 138 |
| CK1e_Hsap            | 138 |
| CK1d_Hsap            | 138 |
| CK1a2_Hsap           | 138 |
| CK1a_Hsap            | 148 |
| CK1d_Mdom            | 138 |
| CK1d_B_Tnig          | 138 |
| CK1a_A_Tnig          | 138 |
| CK1e_B_Drer          | 138 |
| CK1d_A_Drer          | 138 |
| CK1a_Drer            | 138 |
| CK1d_B_Drer          | 138 |
| CK1a_Hdom            | 138 |

.....310.....320.....330.....340.....350.....360.....370.....380.....390.....400.....410.....420.....430.....440.....450

Activation Segment

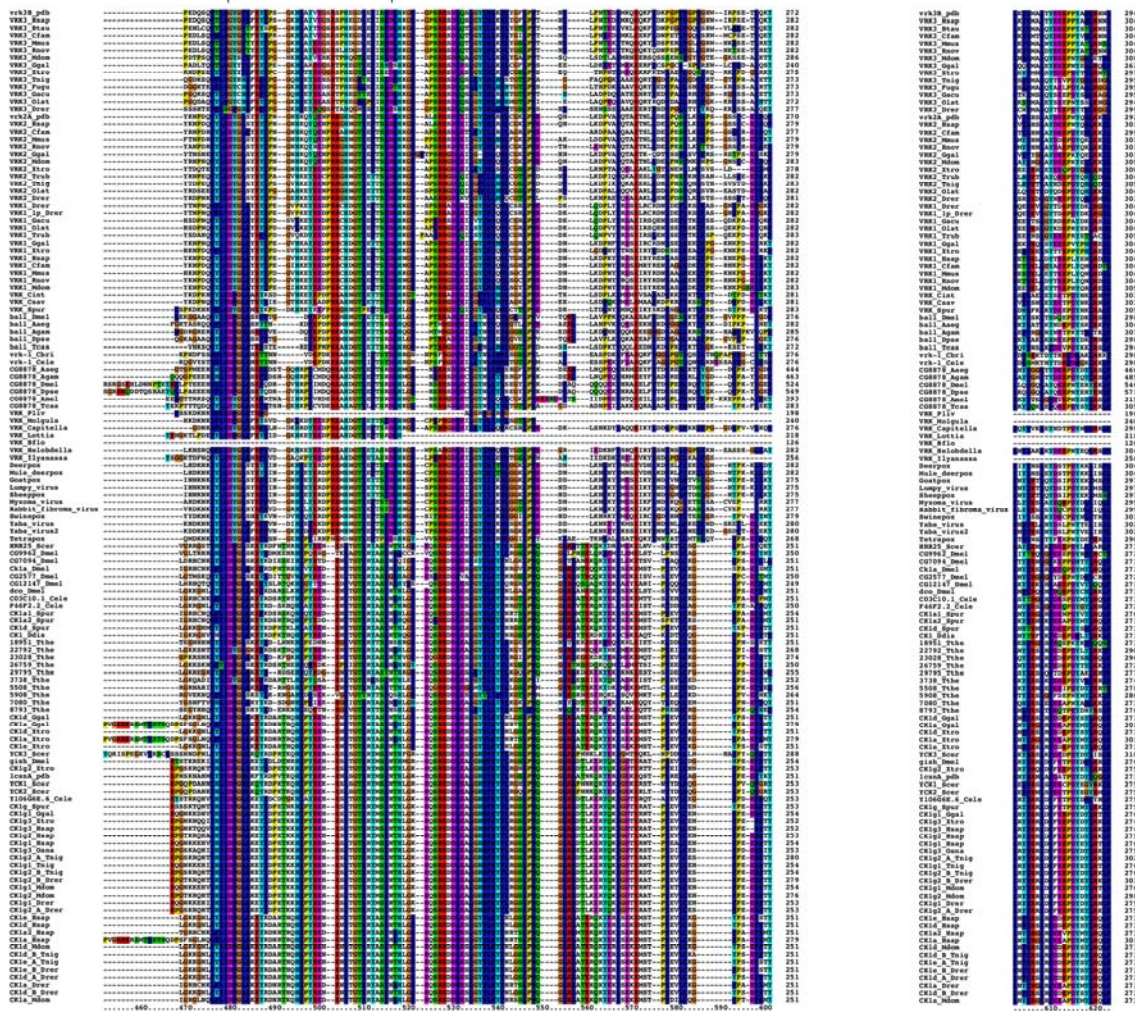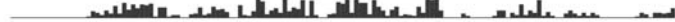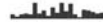

Supplement: mmc1.pdf [file mmc1.pdf]
